# Supplementary material for: Synthesis, microstructures, and gas separation performance of norbornyl bis-benzocyclobutene-Tröger's base polymers derived from pure regioisomers
Source: Royal Society of Chemistry journal article supplement (doi:10.1039/d2py00210h), 2022-01-01
Supplement: d2py00210h1.pdf [file d2py00210h1.pdf]

## Supporting Information

### Synthesis, microstructures, and gas separation performance of norbornyl bis-benzocyclobutene-Tröger's base polymers derived from pure regioisomers

Xiaofan Hu,<sup>a</sup> Jie Miao,<sup>a</sup> Yuanyuan Pang,<sup>b</sup> Jiayi Zhao,<sup>c</sup> Yao Lu,<sup>a</sup> Heling Guo,<sup>a</sup> Zhen Wang\*<sup>a</sup> and Jingling Yan\*<sup>a</sup>

<sup>a</sup> Ningbo Institute of Material Technology and Engineering, Chinese Academy of Science, Ningbo 315201, China.

<sup>b</sup> College of Science & Technology, Ningbo University, Cixi 315300, China

<sup>c</sup> Changchun Institute of Applied Chemistry, Chinese Academy of Sciences, Changchun 130022, China.

Email: wz@nimte.ac.cn, Jingling, jyan@nimte.ac.cn

#### List of Contents for Supplementary Materials:

---

|                                                                                                                                                                                                                                                                                                                                                                                                                                         |              |
|-----------------------------------------------------------------------------------------------------------------------------------------------------------------------------------------------------------------------------------------------------------------------------------------------------------------------------------------------------------------------------------------------------------------------------------------|--------------|
| <b>Experimental Section</b> .....                                                                                                                                                                                                                                                                                                                                                                                                       | <b>SI-3</b>  |
| <b>Figure S1.</b> <sup>1</sup> H NMR spectra of <i>anti</i> -CANAL-TB-2 and <i>syn</i> -CANAL-TB-2.....                                                                                                                                                                                                                                                                                                                                 | <b>SI-6</b>  |
| <b>Figure S2.</b> <sup>1</sup> H NMR spectra of <i>anti</i> -CANAL-TB-4 and <i>syn</i> -CANAL-TB-4.....                                                                                                                                                                                                                                                                                                                                 | <b>SI-6</b>  |
| <b>Figure S3.</b> FT-IR spectra of <i>anti</i> -CANAL-TB-2 and <i>syn</i> -CANAL-TB-2.....                                                                                                                                                                                                                                                                                                                                              | <b>SI-7</b>  |
| <b>Figure S4.</b> FT-IR spectra of <i>anti</i> -CANAL-TB-4 and <i>syn</i> -CANAL-TB-4.....                                                                                                                                                                                                                                                                                                                                              | <b>SI-7</b>  |
| <b>Figure S5.</b> TGA curves of <i>anti</i> -CANAL-TB-2 and <i>syn</i> -CANAL-TB-2.....                                                                                                                                                                                                                                                                                                                                                 | <b>SI-8</b>  |
| <b>Figure S6.</b> TGA curves of <i>anti</i> -CANAL-TB-4 and <i>syn</i> -CANAL-TB-4.....                                                                                                                                                                                                                                                                                                                                                 | <b>SI-8</b>  |
| <b>Figure S7.</b> Microstructures of CANAL-TB polymers from pure regioisomers <b>(a)</b> and <b>(c)</b> N <sub>2</sub> adsorption/desorption isotherms at 77 K; <b>(b)</b> and <b>(d)</b> pore size distributions calculated by N <sub>2</sub> sorption isotherms using NLDFT method.....                                                                                                                                               | <b>SI-9</b>  |
| <b>Figure S8.</b> <b>(a)</b> Cumulative pore volumes of CANAL-TB-2 calculated from N <sub>2</sub> sorption isotherms; <b>(b)</b> cumulative pore volumes of CANAL-TB-2 calculated from CO <sub>2</sub> sorption isotherms; <b>(c)</b> cumulative pore volumes of CANAL-TB-4 calculated from N <sub>2</sub> sorption isotherms; <b>(d)</b> cumulative pore volumes of CANAL-TB-4 calculated from CO <sub>2</sub> sorption isotherms..... | <b>SI-10</b> |
| <b>Figure S9.</b> Distances of two <i>ortho</i> -methyl groups in a random chain of simulated model for <i>anti</i> -CANAL-TB-4 <b>(a)</b> and <i>syn</i> -CANAL-TB-4 <b>(b)</b> . (unit: Å).....                                                                                                                                                                                                                                       | <b>SI-11</b> |

---

**Figure S10.** H<sub>2</sub>/N<sub>2</sub> separation performance of CANAL-TB polymers from pure regioisomers.....[SI-12](#)  
**Figure S11.** Photographs of CANAL-TB polymers from pure regioisomers.....[SI-12](#)  
**Table S1.** Gas permeabilities and selectivities of reported TB-based polymers.....[SI-13](#)  
**Table S2.** Diffusion/solubility coefficients and selectivities of CANAL-TB polymers.....[SI-15](#)  
**Table S3.** Gas permeability and ideal selectivity of the aged CANAL-TB polymers.....[SI-16](#)

## EXPERIMENTAL SECTION

### Materials

3-Bromo-2-methylaniline, 4-bromo-2,5-dimethylaniline, norbornadiene (NBD), anhydrous 1,4-dioxane, cesium carbonate ( $\text{Cs}_2\text{CO}_3$ ), and triphenylphosphine ( $\text{PPh}_3$ ) were purchased from Energy Chemical (Shanghai, China). Dimethoxymethane (DMM) and trifluoroacetic acid (TFA) were obtained from TCI Chemicals (Shanghai, China). All other chemicals were purchased from Titan Scientific Co., Ltd (Shanghai, China).

### Monomer Synthesis

All the CANAL-diamines in this work were prepared according to literature procedures, and the pure regioisomers were obtained by column chromatography.<sup>1,2</sup> A representative procedure was shown below.

$\text{Pd}(\text{OAc})_2$  (0.045 g, 0.2 mmol),  $\text{PPh}_3$  (0.105 g, 0.4 mmol),  $\text{Cs}_2\text{CO}_3$  (6.52 g, 20 mmol), 3-bromo-2-methylaniline (3.72 g, 20 mmol.), NBD (0.92 g, 10 mmol) 1,4-dioxane (70 mL) were mixed in a 250-mL two-necked flask in a glove box. The flask was then connected to a Schlenk line and heated at 130 °C for 24 hours in argon. Afterwards, the reaction was cooled to a temperature of 60 °C, and the inorganic salts were removed by filtration. The filtrate was concentrated, and *anti*-CANAL-4-MeNH<sub>2</sub> and *syn*-CANAL-4-MeNH<sub>2</sub> were isolated by column chromatography using a mixture of ethyl acetate and petroleum ether (1:4, v:v).

***Anti*-CANAL-4-MeNH<sub>2</sub>** Yield: 42%. Thin layer chromatography (TLC): acetate/petroleum ether = 1/2.  $R_f$  = 0.76. <sup>1</sup>H NMR (600 MHz, DMSO-*d*<sub>6</sub>):  $\delta$  6.53 (d,  $J$  = 7.6 Hz, 2H), 6.43 (d,  $J$  = 7.6 Hz, 2H), 4.56 (s, 4H), 3.06 (s, 2H), 3.01 (d,  $J$  = 3.0 Hz, 2H), 2.17 (s, 2H), 1.88 (s, 6H), 0.63 (s, 2H). <sup>13</sup>C NMR (151 MHz, DMSO-*d*<sub>6</sub>):  $\delta$  146.34, 145.10, 132.95, 120.05, 116.20, 114.17, 47.54, 47.27, 36.90, 26.39, 12.18. MS (MALDI+):  $m/z$  = 302.1791 ( $[\text{C}_{21}\text{H}_{22}\text{N}_2]^+$ ).

***Syn*-CANAL-4-MeNH<sub>2</sub>** Yield: 24%. TLC: acetate/petroleum ether = 1/2.  $R_f$  = 0.65. <sup>1</sup>H NMR (600 MHz, DMSO-*d*<sub>6</sub>):  $\delta$  6.53 (d,  $J$  = 7.6 Hz, 2H), 6.43 (d,  $J$  = 7.6 Hz, 2H), 4.56 (s, 4H), 3.09 (d,  $J$  = 3.5 Hz, 2H), 2.98 (d,  $J$  = 3.5 Hz, 2H), 2.25 (s, 1H), 2.09 (s, 1H), 1.90 (s, 6H), 0.64 (s, 2H). <sup>13</sup>C NMR (151 MHz, DMSO-*d*<sub>6</sub>):  $\delta$  146.32, 145.02, 133.02, 120.02, 116.22, 114.19, 47.64, 47.19, 37.94, 35.87, 26.39, 12.26. MS (MALDI+):  $m/z$  = 302.1786 ( $[\text{C}_{21}\text{H}_{22}\text{N}_2]^+$ ).

***Anti*-CANAL-2-Me<sub>2</sub>NH<sub>2</sub>** Yield: 30%. TLC: acetate/dichloromethane/petroleum ether = 1/4/6.  $R_f$  = 0.64. <sup>1</sup>H NMR (400 MHz, DMSO-*d*<sub>6</sub>):  $\delta$  6.24 (s, 2H), 4.46 (s, 4H), 3.02 (d,  $J$  = 3.5 Hz, 2H), 2.98 (d,  $J$  = 3.5 Hz, 2H), 2.19 (s, 2H), 1.99 (s, 6H), 1.86 (s, 6H), 0.64 (s, 2H). <sup>13</sup>C NMR (101 MHz, DMSO-*d*<sub>6</sub>):  $\delta$  146.51, 144.64, 131.75, 129.25, 114.95, 113.41, 47.07, 46.36, 36.04, 26.57, 16.79, 11.93.

***Syn*-CANAL-2-Me<sub>2</sub>NH<sub>2</sub>** Yield: 25%. TLC: acetate/dichloromethane/petroleum ether = 1/4/6.  $R_f$  = 0.61. <sup>1</sup>H NMR (400 MHz, DMSO-*d*<sub>6</sub>):  $\delta$  6.24 (s, 2H), 4.46 (s, 4H), 3.03 (d,  $J$  = 3.4 Hz, 2H), 2.97 (d,  $J$  = 3.4 Hz, 2H), 2.20 (s, 1H), 2.18 (s, 1H), 1.99 (s, 6H), 1.86 (s, 6H), 0.64 (s, 2H). <sup>13</sup>C NMR (101 MHz, DMSO-*d*<sub>6</sub>):  $\delta$  146.46, 144.54, 131.86, 129.24, 114.99, 113.45, 47.05, 46.38, 36.40, 35.69, 26.57, 16.77, 11.95.

### Polymer Synthesis

The CANAL-TB polymers in this study were synthesized according to a reported method.<sup>3,4</sup> A typical polymerization process is shown below.

***Anti*-CANAL-TB-4.** *Anti*-CANAL-4-MeNH<sub>2</sub> (1.0104 g 3.34 mmol) and DMM (1.48 mL, 16.7 mmol) were placed into a 50 mL round-bottomed flask cooled by an ice bath. TFA (15 mL) was then added dropwise. Once the solid completely dissolved, the reaction was warmed up to ambient temperature and stirred for another 60 min. The resulting viscous solution was neutralized with ammonium hydroxide solution (5%). The fibrous polymer was collected, Soxhlet extracted with for 24 h, purified by re-dissolution in chloroform and precipitation into methanol, and dried at 120 °C in vacuum for 20 h to produce *anti*-CANAL-TB-4 (yield: 82%). <sup>1</sup>H NMR (400 MHz, CDCl<sub>3</sub>):  $\delta$  6.41 (s, 2H), 4.58 (s, 2H), 4.26 (s, 2H), 3.92 (s, 2H), 3.14 (s, 4H), 2.67-1.77 (m, 8H), 0.76 (s, 2H); FT-IR

(wavenumber,  $\text{cm}^{-1}$ ): 2925, 2846 (C-H vibration), 1458, 1437, 1412 (aromatic C=C vibration), 1346 (C-H rotation), 1198, 1101 (C-N vibration);  $M_w = 132.5 \text{ kg/mol}$ , PDI = 2.13;  $T_d^{5\%} = 431 \text{ }^\circ\text{C}$ ;  $S_{\text{BET}} = 826 \text{ m}^2 \text{ g}^{-1}$ , total pore volume =  $0.62 \text{ cm}^3 \text{ g}^{-1}$  (at  $P/P_0 = 0.99$ );  $\text{CO}_2$  uptake =  $59.3 \text{ cm}^3 \text{ g}^{-1}$ ;  $\rho = 1.013 \text{ g/cm}^3$ ,  $FFV_{\text{sim}} = 0.319$ .

**Syn-CANAL-TB-4.** Yield: 84%.  $^1\text{H}$  NMR (400 MHz,  $\text{CDCl}_3$ ):  $\delta$  6.40 (s, 2H), 4.58 (s, 2H), 4.28 (s, 2H), 3.92 (s, 2H), 3.11 (s, 4H), 2.75-1.85 (m, 8H), 0.75 (s, 2H); FT-IR (wavenumber,  $\text{cm}^{-1}$ ): 2927, 2848 (C-H vibration), 1458, 1437, 1412 (aromatic C=C vibration), 1346 (C-H rotation), 1198, 1101 (C-N vibration);  $M_w = 117.8 \text{ kg/mol}$ , PDI = 1.93;  $T_d^{5\%} = 423 \text{ }^\circ\text{C}$ ;  $S_{\text{BET}} = 855 \text{ m}^2 \text{ g}^{-1}$ , total pore volume =  $0.63 \text{ cm}^3 \text{ g}^{-1}$  (at  $P/P_0 = 0.99$ );  $\text{CO}_2$  uptake =  $59.6 \text{ cm}^3 \text{ g}^{-1}$ ;  $\rho = 1.010 \text{ g/cm}^3$ ,  $FFV_{\text{sim}} = 0.323$ .

**Anti-CANAL-TB-2.** Yield: 87%.  $^1\text{H}$  NMR (400 MHz,  $\text{CDCl}_3$ )  $\delta$  4.42 (s, 2H), 4.30-4.14 (m, 2H), 3.86 (s, 2H), 3.14 (s, 4H), 2.65-2.07 (m,  $J = 33.9 \text{ Hz}$ , 8H), 1.92 (s, 6H), 0.80 (s, 2H); FT-IR (wavenumber,  $\text{cm}^{-1}$ ): 2920, 2879, 2843 (C-H vibration), 1437 (aromatic C=C vibration), 1354 (C-H rotation), 1198, 1101 (C-N vibration);  $M_w = 87.2 \text{ kg/mol}$ , PDI = 1.87;  $T_d^{5\%} = 441 \text{ }^\circ\text{C}$ ;  $S_{\text{BET}} = 846 \text{ m}^2 \text{ g}^{-1}$ , total pore volume =  $0.65 \text{ cm}^3 \text{ g}^{-1}$  (at  $P/P_0 = 0.99$ );  $\text{CO}_2$  uptake =  $56.8 \text{ cm}^3 \text{ g}^{-1}$ ;  $\rho = 0.972 \text{ g/cm}^3$ ,  $FFV_{\text{sim}} = 0.323$ .

**Syn-CANAL-TB-2** Yield: 85%.  $^1\text{H}$  NMR (400 MHz,  $\text{CDCl}_3$ ):  $\delta$  4.42 (s, 2H), 4.23 (s, 2H), 3.86 (s, 2H), 3.11 (s, 4H), 2.59-2.05 (m, 8H), 1.91 (s, 6H), 0.76 (s, 2H); FT-IR (wavenumber,  $\text{cm}^{-1}$ ): 2922, 2879, 2843 (C-H vibration), 1437 (aromatic C=C vibration), 1354 (C-H rotation), 1200, 1101 (C-N vibration);  $M_w = 103.6 \text{ kg/mol}$ , PDI = 2.04;  $T_d^{5\%} = 443 \text{ }^\circ\text{C}$ ;  $S_{\text{BET}} = 818 \text{ m}^2 \text{ g}^{-1}$ , total pore volume =  $0.62 \text{ cm}^3 \text{ g}^{-1}$  (at  $P/P_0 = 0.99$ );  $\text{CO}_2$  uptake =  $55.6 \text{ cm}^3 \text{ g}^{-1}$ ;  $\rho = 0.978 \text{ g/cm}^3$ ,  $FFV_{\text{sim}} = 0.318$ .

#### Membrane Fabrication

The chloroform solution of CANAL-TB polymers (3wt%) were filtered through a  $0.45 \mu\text{m}$  PTFE syringe filters to remove insoluble impurities, and then cast onto flat glass plates. The solvent was removed by slow evaporation at room temperature for 3 days. The resultant membranes were peeled off from the substrate, dried at  $120 \text{ }^\circ\text{C}$  in vacuum for 24 h, soaked in methanol for 24 h, and then dried at  $120 \text{ }^\circ\text{C}$  in vacuum for another 24 h.

#### Characterization

A Bruker Autoflex III Smartbeam Mass spectrometer with a laser source of  $\lambda = 355 \text{ nm}$  were used to collect the high resolution MALDI-TOF-MS spectra. The  $^1\text{H}$  and  $^{13}\text{C}$  NMR spectra were obtained using a Bruker 600 spectrometer. Fourier transform infrared (FTIR) spectra were obtained using a Agilent Cary 660 spectrometer, respectively. Gel permeation chromatography was conducted on a HLC-8420 instrument (Tosoh Co.), using chloroform as the eluent. Thermal gravimetric analysis was performed on a Q55 TGA system (TA Instruments) in nitrogen at a heating rate of  $10 \text{ }^\circ\text{C min}^{-1}$ .  $\text{N}_2$  sorption and  $\text{CO}_2$  isotherms were measured on an ASAP 2460 instrument (Micromeritics) at 77 K and 273 K, respectively. Wide-angle X-ray diffraction (WAXD) patterns were obtained using a Ultima IV X-ray diffractometer (Rigaku, Japan) with a scanning rate of  $0.5 \text{ }^\circ \text{ min}^{-1}$ . Inter-chain distances ( $d$ -spacing values) were calculated according to Bragg's equation. Film density ( $\rho$ ) was determined by using a density balance (FA2104J, Shanghai) at an accuracy of 0.1 mg.  $FFV$  was calculated by the following equation:

$$FFV = 1 - \frac{1.3\rho V_w}{M}$$

where  $M$  is the molar mass ( $\text{g mol}^{-1}$ ) of the repeat unit,  $V_w$  represents the van der Waals volume calculated by a literature method.<sup>2</sup>

Molecular dynamics (MD) simulations were used to calculate  $FFV$  according to a literature procedure<sup>5</sup> and measured densities. An amorphous cell module in Materials Studio 8.0 was adopted for building simulation

models using ten polymer chains with a repeat unit of ten. Before running the procedure, 20 cycles of annealing were carried on at 300-1500 K. Then, cells were equilibrated by energy minimization, and several MD simulations were executed in a NPT ensemble (constant number of molecules, pressure = 1 atm, and temperature = 298.15 K) for more than 6 ns. After adjusting cell parameters, the cells reached the experimental densities. Afterwards, 20 cycles of annealing were performed at setting temperature ranging from 300 to 1500 K with NVT ensemble (constant number of molecules). Then, the cells were equilibrated by energy minimization and several MD simulations were performed in a NVT ensemble at the temperature of 298.15 K for more than 3 ns. The Atom Volumes and Surfaces module was adopted to measure the free volume and occupied volume with selection of 1.0 Å as the Connolly radius. Besides, pore size distributions (PSD) of CANAL-TBs were also simulated according to the reported method using Zeo++.<sup>6</sup> With the calculation by Monte Carlo sampling approach, the number of Monte Carlo samples per unit cell is set to 100,000 with a probe radius of 0.2 Å. The PSD scan range is 0-100 Å with 0.1 Å /step.

Gas permeation measurements were performed at 35 °C with a constant-volume/variable-pressure method. Gas permeability ( $P$ ) was calculated according to the following equation:

$$P = D \times S = \frac{Vl}{ATp_{up} \times 0.278} \times \frac{dp}{dt} \times 10^{10}$$

where  $P$  (Barrer),  $V$  (cm<sup>3</sup>),  $l$  (cm),  $A$  (cm<sup>2</sup>),  $T$  (K),  $p_{up}$  (cmHg) and  $dp/dt$  represent pure gas permeation, downstream chamber volume, film thickness, effective membrane area, measurement temperature, upstream pressure, and increased rate of pressure in the downstream chamber at steady state, respectively. Diffusion coefficient ( $D$ ) was estimated using lag time ( $\vartheta$ ) from the equation  $D = l^2 / 6\vartheta$ . Solubility coefficient ( $S$ ) was calculated from the solution-diffusion mechanism ( $S = P/D$ ).

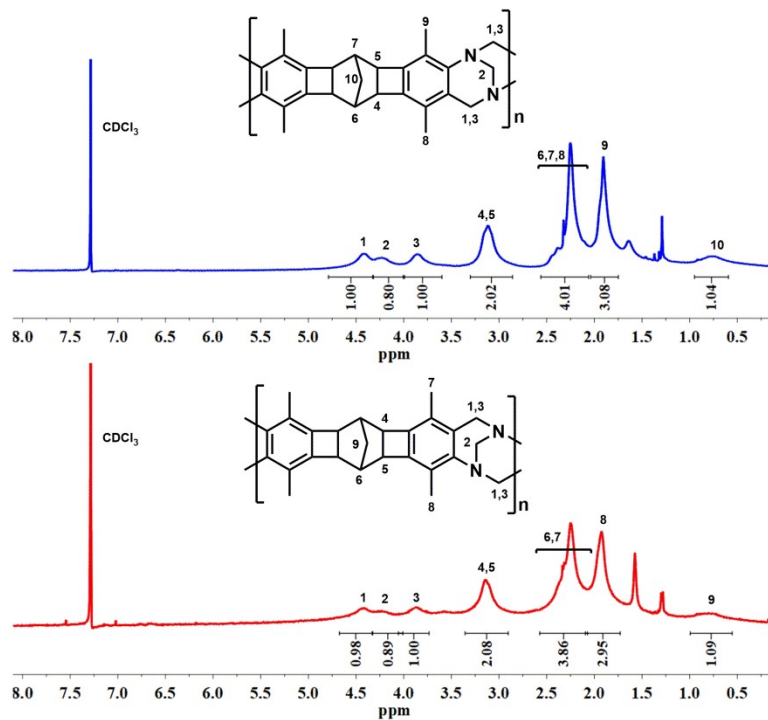

Figure S1. <sup>1</sup>H NMR spectra of *anti*-CANAL-TB-2 and *syn*-CANAL-TB-2.

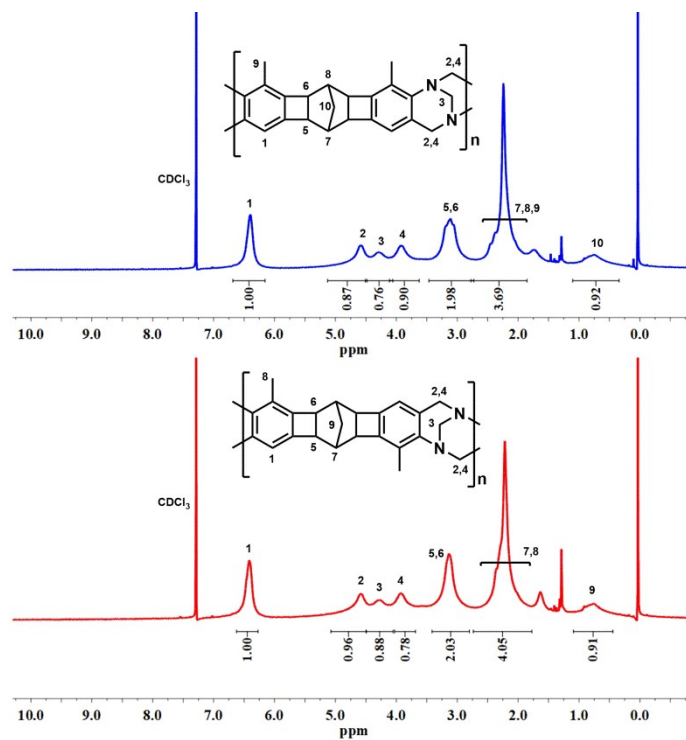

Figure S2. <sup>1</sup>H NMR spectra of *anti*-CANAL-TB-4 and *syn*-CANAL-TB-4.

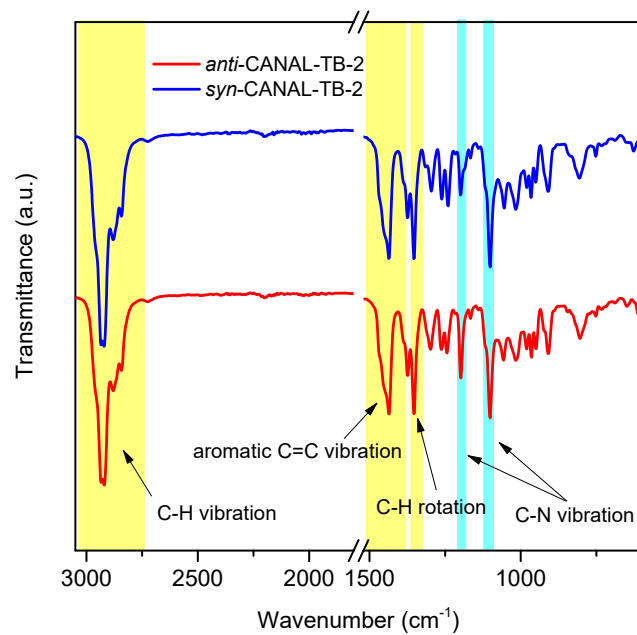

**Figure S3.** FT-IR spectra of *anti*-CANAL-TB-2 and *syn*-CANAL-TB-2.

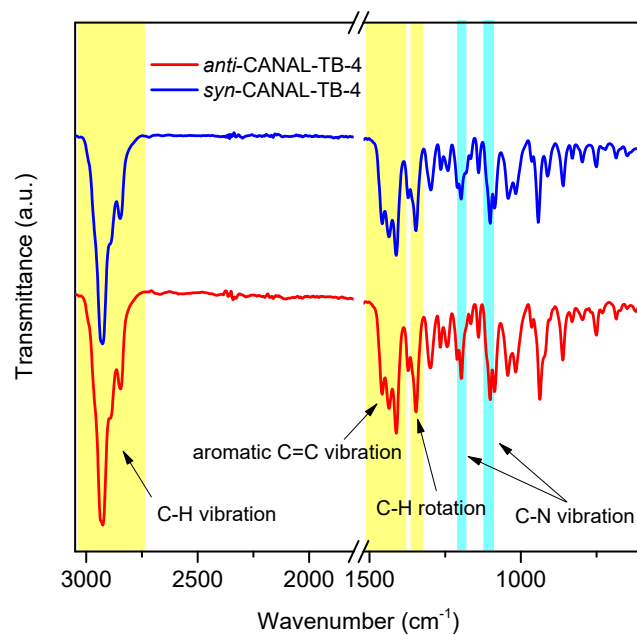

**Figure S4.** FT-IR spectra of *anti*-CANAL-TB-4 and *syn*-CANAL-TB-4.

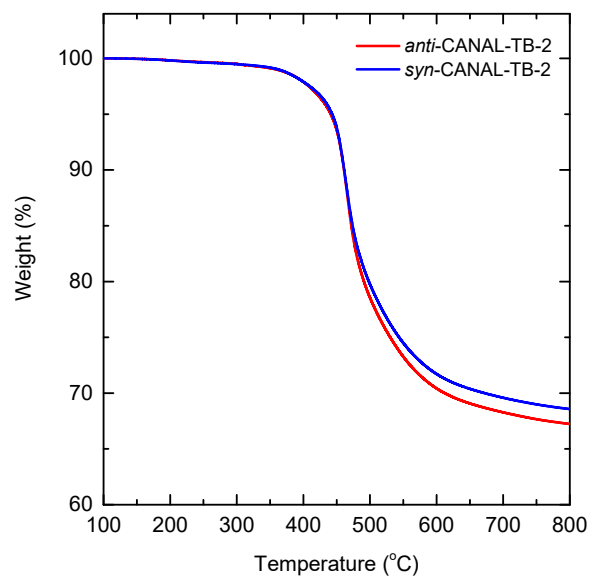

Figure S5. TGA curves of *anti*-CANAL-TB-2 and *syn*-CANAL-TB-2.

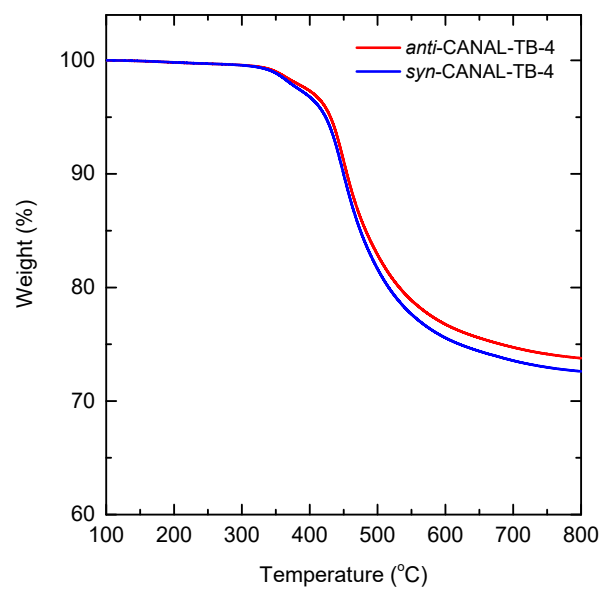

Figure S6. TGA curves of *anti*-CANAL-TB-4 and *syn*-CANAL-TB-4.



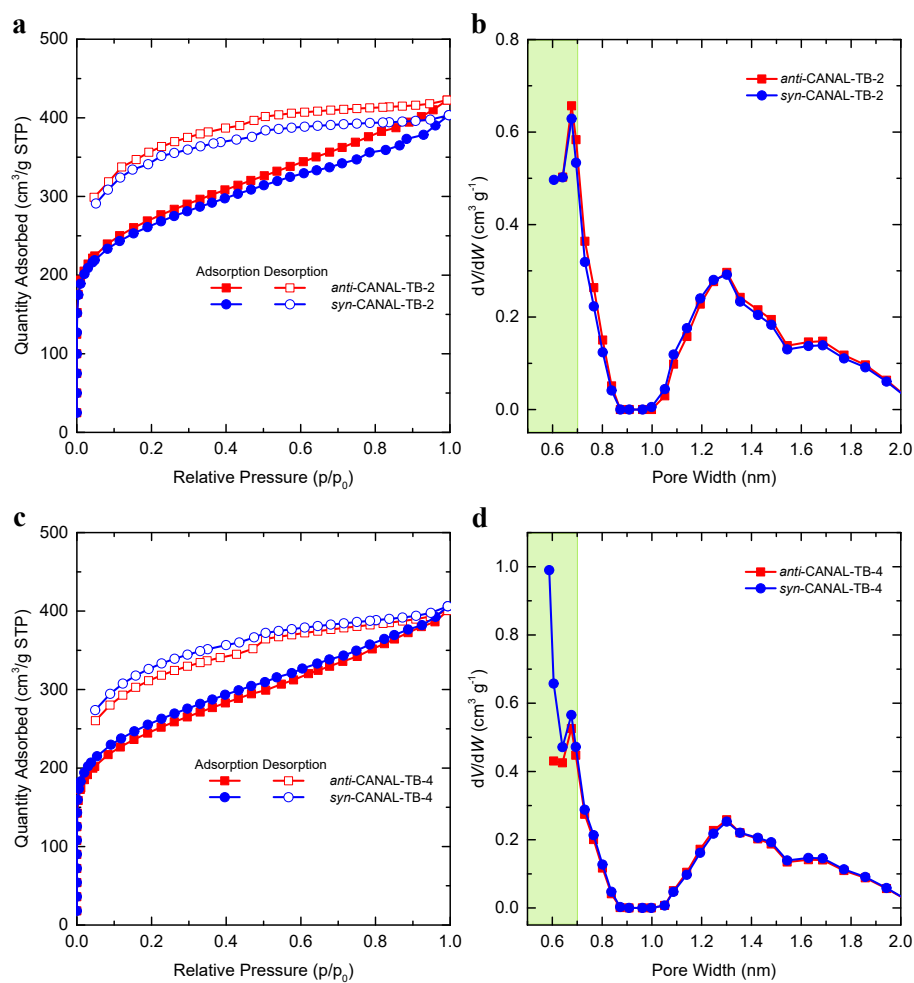

**Figure S7.** Microstructures of CANAL-TB polymers from pure regioisomers: **(a)** and **(c)** N<sub>2</sub> adsorption/desorption isotherms at 77 K; **(b)** and **(d)** pore size distributions calculated by N<sub>2</sub> sorption isotherms using NLDFT method.

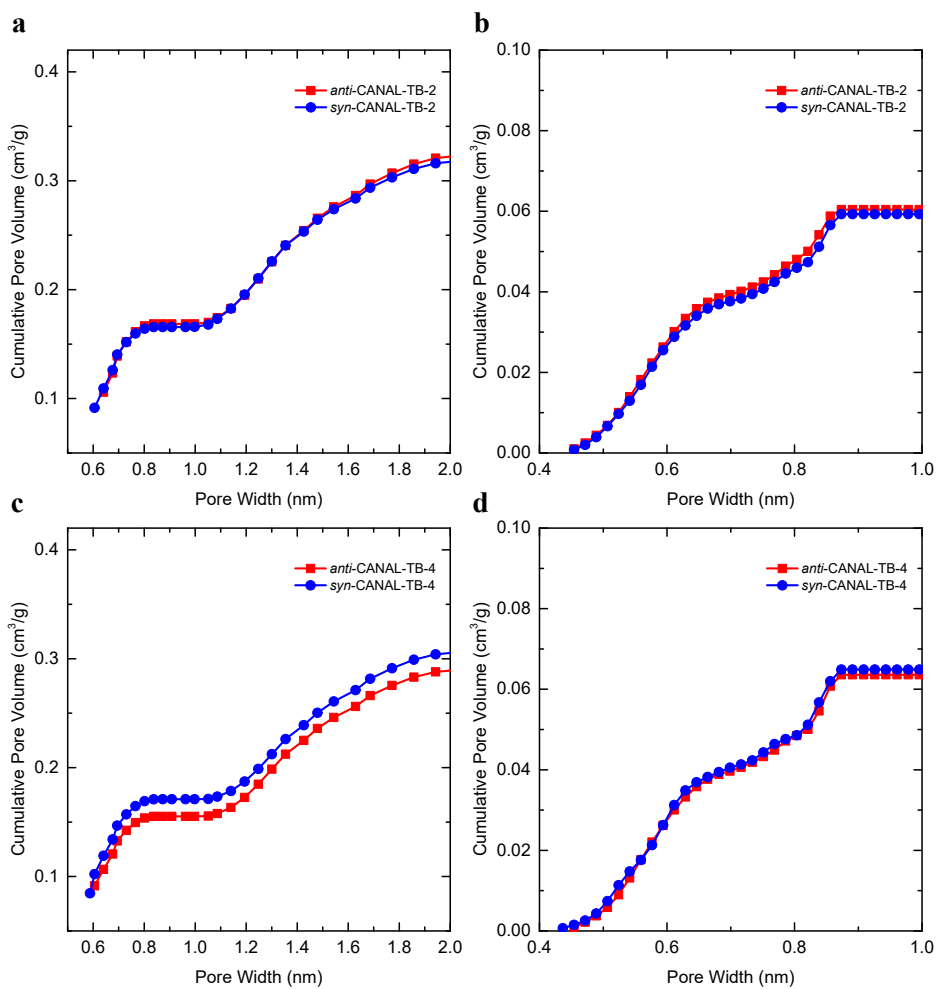

**Figure S8.** (a) Cumulative pore volumes of CANAL-TB-2 calculated from N<sub>2</sub> sorption isotherms; (b) cumulative pore volumes of CANAL-TB-2 calculated from CO<sub>2</sub> sorption isotherms; (c) cumulative pore volumes of CANAL-TB-4 calculated from N<sub>2</sub> sorption isotherms; (d) cumulative pore volumes of CANAL-TB-4 calculated from CO<sub>2</sub> sorption isotherms.

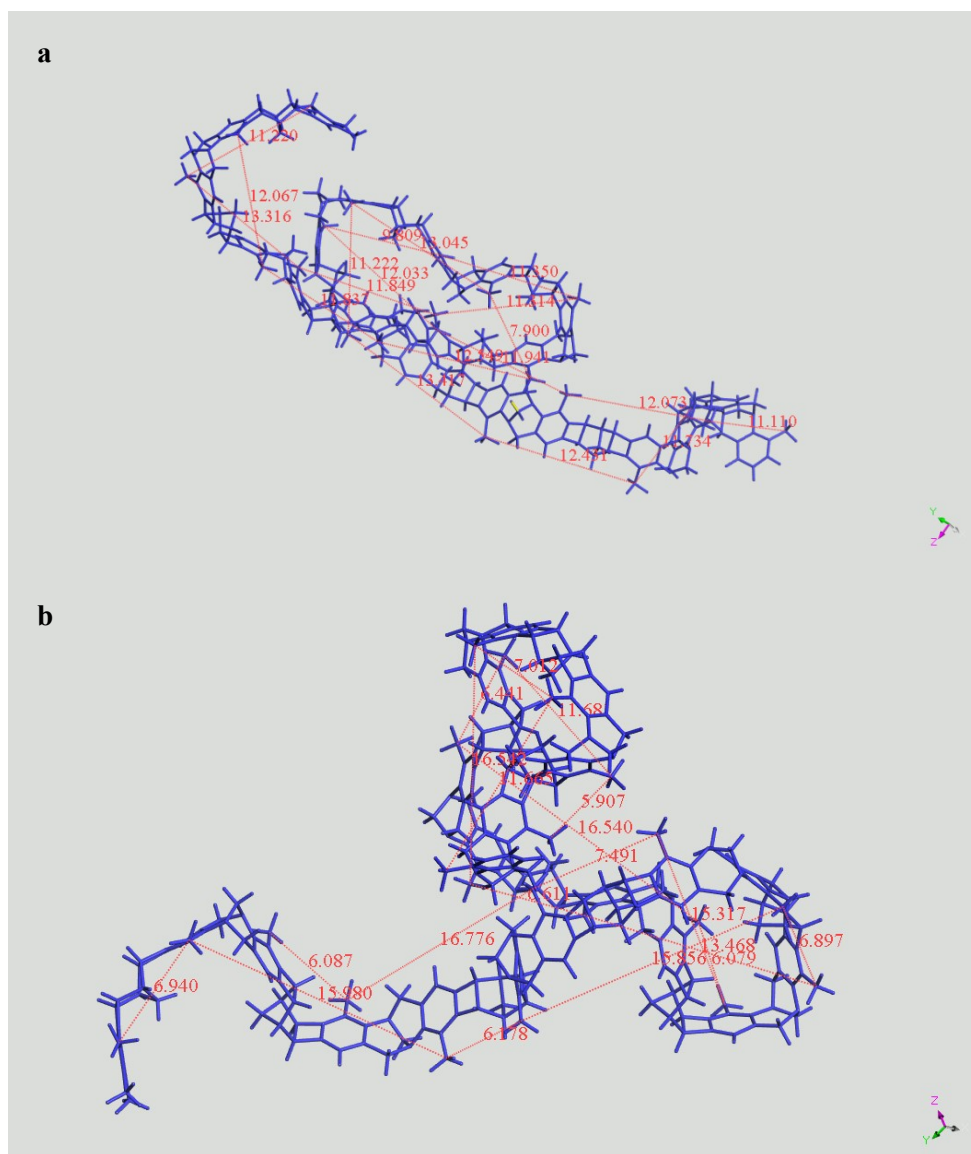

**Figure S9.** The distance of two *ortho*-methyl groups in a random chain of simulated model for *anti*-CANAL-TB-4 (a) and *syn*-CANAL-TB-4 (b). (unit: Å)

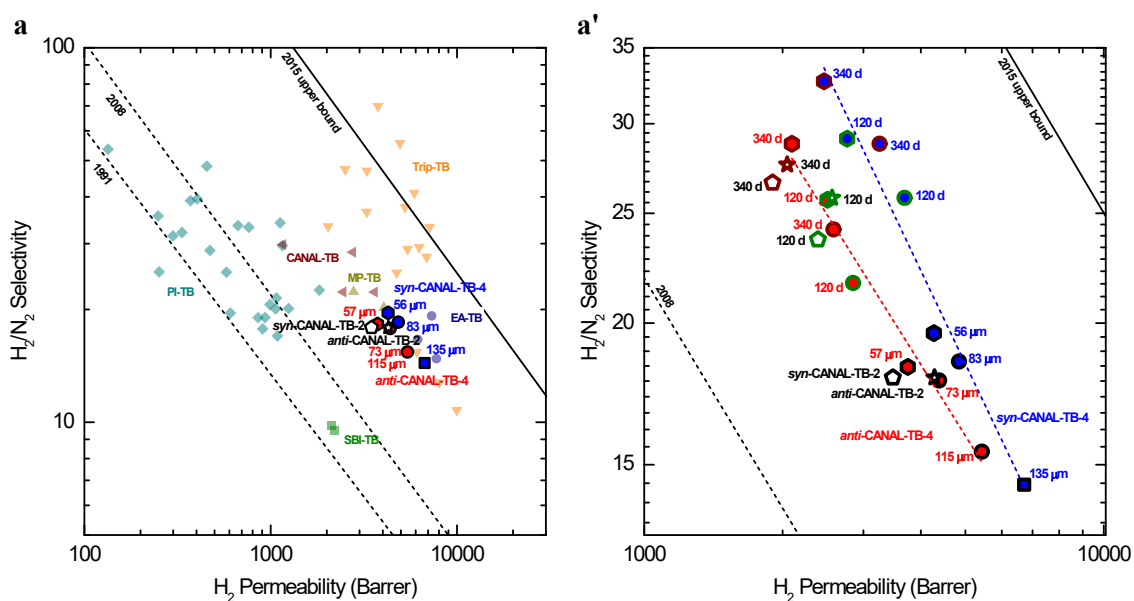

**Figure S10.**  $H_2/N_2$  separation performance of *anti*-CANAL-TB-2 (open star symbols), *syn*-CANAL-TB-2 (open pentagons symbols), *anti*-CANAL-TB-4 (red solid symbols) and *syn*-CANAL-TB-4 (blue solid symbols), for comparison with previously published data of CANAL-TBs (wine solid left-triangles), PI-TBs (light cyan solid diamonds), SBI-TBs (light olive solid squares), EA-TBs (light navy solid circles), MP-TBs (light yellow solid up-triangles) and Trip-TBs (light orange solid down-triangles) (Table S1).

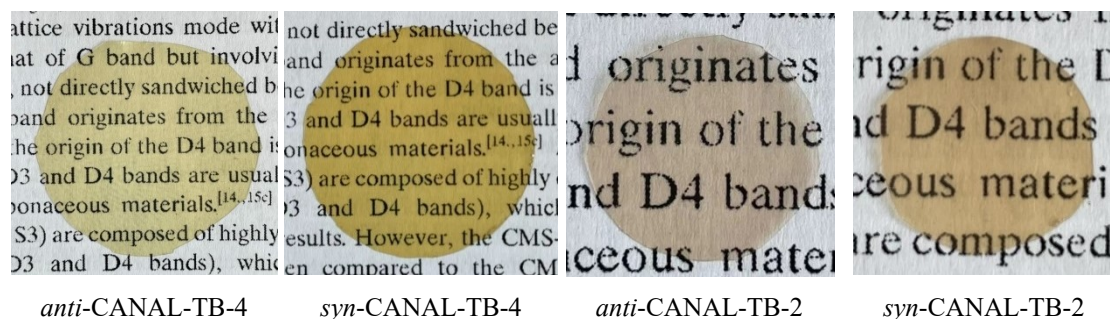

**Figure S11.** Photographs of CANAL-TB polymers from pure regio-isomers

**Table S1.** Gas permeabilities and selectivities of reported TB-based polymers

| Polymers [Reference]                          | Permeability (Barrer) |                 |                |                |                 | Selectivity ( $\alpha$ )        |                                |                                |                                  |
|-----------------------------------------------|-----------------------|-----------------|----------------|----------------|-----------------|---------------------------------|--------------------------------|--------------------------------|----------------------------------|
|                                               | H <sub>2</sub>        | CO <sub>2</sub> | O <sub>2</sub> | N <sub>2</sub> | CH <sub>4</sub> | H <sub>2</sub> /CH <sub>4</sub> | H <sub>2</sub> /N <sub>2</sub> | O <sub>2</sub> /N <sub>2</sub> | CO <sub>2</sub> /CH <sub>4</sub> |
| CANAL-TB-1 <sup>2</sup>                       | 2760                  | 1678            | 463            | 97             | 121             | 23                              | 28                             | 4.8                            | 14                               |
| aged 300 days                                 | 1163                  | 749             | 204            | 39             | 53              | 22                              | 30                             | 5.2                            | 14                               |
| CANAL-TB-2 <sup>2</sup>                       | 3608                  | 2520            | 747            | 162            | 205             | 18                              | 22                             | 4.6                            | 12                               |
| aged 300 days                                 | 2452                  | 1751            | 528            | 110            | 129             | 19                              | 22                             | 4.8                            | 14                               |
| <b>PI-TBs</b>                                 |                       |                 |                |                |                 |                                 |                                |                                |                                  |
| PI-TB-1 <sup>3</sup>                          | 607                   | 457             | 119            | 31             | 27              | 22                              | 20                             | 3.8                            | 17                               |
| PI-TB-2 <sup>3</sup>                          | 134                   | 55              | 14             | 2.5            | 2.1             | 64                              | 54                             | 5.6                            | 26                               |
| PI-TB-3 <sup>7</sup>                          | 299                   | 218             | 42             | 10             | 6.7             | 45                              | 31                             | 4.4                            | 33                               |
| PI-TB-4 <sup>7</sup>                          | 40                    | 14              | 3.5            | 1.3            | 1.0             | 40                              | 31                             | 2.7                            | 14                               |
| PI-TB-5 <sup>7</sup>                          | 54                    | 20              | 4.9            | 1.9            | 1.7             | 32                              | 28                             | 2.6                            | 12                               |
| CoPI-TB-1 <sup>8</sup>                        | 249                   | 158             | 34             | 7.0            | 7.0             | 36                              | 36                             | 4.9                            | 23                               |
| CoPI-TB-2 <sup>8</sup>                        | 403                   | 209             | 53             | 10             | 10              | 40                              | 40                             | 5.2                            | 21                               |
| CoPI-TB-3 <sup>8</sup>                        | 371                   | 196             | 47             | 10             | 8.9             | 42                              | 39                             | 4.9                            | 22                               |
| CoPI-TB-4 <sup>8</sup>                        | 667                   | 241             | 96             | 20             | 18              | 37                              | 34                             | 4.8                            | 13                               |
| CoPI-TB-5 <sup>8</sup>                        | 334                   | 228             | 48             | 10             | 11              | 29                              | 32                             | 4.6                            | 20                               |
| CoPI-TB-6 <sup>8</sup>                        | 472                   | 330             | 73             | 16             | 19              | 25                              | 29                             | 4.5                            | 17                               |
| Ac-CoPI-TB-1 <sup>9</sup>                     | 1826                  | 1366            | 331            | 81             | 85              | 21                              | 23                             | 4.1                            | 16                               |
| Ac-CoPI-TB-2 <sup>9</sup>                     | 1125                  | 555             | 166            | 33             | 33              | 34                              | 34                             | 5.0                            | 17                               |
| aged 348 days                                 | 454                   | 205             | 49             | 9.4            | 8.3             | 55                              | 48                             | 5.2                            | 25                               |
| Ac-CoPI-TB-3 <sup>9</sup>                     | 579                   | 377             | 92             | 23             | 22              | 26                              | 25                             | 4.0                            | 17                               |
| Ac-CoPI-TB-4 <sup>9</sup>                     | 252                   | 203             | 38             | 10             | 10              | 25                              | 25                             | 3.8                            | 20                               |
| PI-TB-N <sup>9</sup>                          | 1156                  | 731             | 185            | 39             | 38              | 30                              | 30                             | 4.7                            | 19                               |
| aged 429 days                                 | 763                   | 456             | 112            | 23             | 21              | 36                              | 33                             | 4.9                            | 22                               |
| Bio-PITB-1-Vac <sup>4</sup>                   | 906                   | 1123            | 208            | 51             | 50              | 18                              | 18                             | 4.1                            | 22                               |
| aged 100 days                                 | 856                   | 1008            | 187            | 45             | 41              | 21                              | 19                             | 4.2                            | 25                               |
| Bio-PITB-1-Air <sup>4</sup>                   | 1088                  | 1352            | 251            | 64             | 59              | 18                              | 17                             | 3.9                            | 23                               |
| aged 100 days                                 | 933                   | 1076            | 205            | 49             | 43              | 22                              | 19                             | 4.2                            | 25                               |
| Bio-PITB-2-Vac <sup>4</sup>                   | 1064                  | 1201            | 237            | 53             | 49              | 22                              | 20                             | 4.5                            | 25                               |
| aged 100 days                                 | 990                   | 1087            | 214            | 48             | 40              | 25                              | 21                             | 4.5                            | 27                               |
| Bio-PITB-2-Air <sup>4</sup>                   | 1248                  | 1384            | 267            | 62             | 59              | 21                              | 20                             | 4.3                            | 23                               |
| aged 100 days                                 | 1073                  | 1161            | 227            | 50             | 44              | 24                              | 21                             | 4.5                            | 26                               |
| <b>SBI-TBs</b>                                |                       |                 |                |                |                 |                                 |                                |                                |                                  |
| PIM-SBI-TB (157 $\mu\text{m}$ ) <sup>10</sup> | 2200                  | 2900            | 720            | 232            | 450             | 5                               | 9                              | 3.1                            | 6                                |
| PIM-SBI-TB (128 $\mu\text{m}$ ) <sup>10</sup> | 2110                  | 2720            | 657            | 215            | 406             | 5                               | 10                             | 3.1                            | 7                                |
| <b>EA-TBs</b>                                 |                       |                 |                |                |                 |                                 |                                |                                |                                  |
| PIM-EA-TB (181 $\mu\text{m}$ ) <sup>10</sup>  | 7760                  | 7140            | 2150           | 525            | 699             | 11                              | 15                             | 4.1                            | 10                               |

|                                             |      |       |      |     |      |    |    |     |    |
|---------------------------------------------|------|-------|------|-----|------|----|----|-----|----|
| aged 24 h                                   | 6155 | 4780  | 1590 | 370 | 502  | 12 | 17 | 4.3 | 10 |
| PIM-EA-TB (95 $\mu\text{m}$ ) <sup>10</sup> | 7310 | 5100  | 1630 | 380 | 572  | 13 | 19 | 4.3 | 9  |
| <b>MP-TBs</b>                               |      |       |      |     |      |    |    |     |    |
| PIM-MP-TB <sup>11</sup>                     | 4050 | 3500  | 999  | 200 | 264  | 15 | 20 | 5.0 | 13 |
| PIM-MP-TB (140 °C) <sup>11</sup>            | 2790 | 2340  | 648  | 125 | 158  | 18 | 22 | 5.2 | 15 |
| <b>Trip-TBs</b>                             |      |       |      |     |      |    |    |     |    |
| PIM-Trip-TB <sup>12</sup>                   | 8039 | 9709  | 2718 | 629 | 905  | 9  | 13 | 4.3 | 11 |
| aged 100 days                               | 4740 | 3951  | 1073 | 189 | 218  | 22 | 25 | 5.7 | 18 |
| PIM-BTrip-TB <sup>13</sup>                  | 9980 | 13200 | 3290 | 926 | 1440 | 7  | 11 | 3.6 | 9  |
| aged 166 days                               | 4280 | 4150  | 1170 | 216 | 283  | 15 | 20 | 5.4 | 15 |
| PIM-TMN-Trip-TB <sup>14</sup>               | 6100 | 6060  | 2030 | 396 | 710  | 9  | 15 | 5.1 | 9  |
| CTTB (83 $\mu\text{m}$ ) <sup>15</sup>      | 7136 | 4676  | 1190 | 215 | 317  | 23 | 33 | 5.5 | 15 |
| CTTB (54 $\mu\text{m}$ ) <sup>15</sup>      | 5257 | 3087  | 791  | 140 | 200  | 26 | 38 | 5.7 | 15 |
| aged 150 days                               | 2511 | 1228  | 334  | 53  | 72   | 35 | 47 | 6.3 | 17 |
| CTTB (35 $\mu\text{m}$ ) <sup>15</sup>      | 3768 | 1402  | 374  | 54  | 67   | 56 | 70 | 6.9 | 21 |
| MTTB (89 $\mu\text{m}$ ) <sup>15</sup>      | 6273 | 4441  | 1170 | 214 | 318  | 20 | 29 | 5.5 | 14 |
| MTTB (60 $\mu\text{m}$ ) <sup>15</sup>      | 5897 | 3155  | 864  | 144 | 196  | 30 | 41 | 6.0 | 16 |
| aged 150 days                               | 3283 | 1693  | 440  | 70  | 92   | 36 | 47 | 6.3 | 18 |
| MTTB (37 $\mu\text{m}$ ) <sup>15</sup>      | 4950 | 2257  | 580  | 89  | 118  | 42 | 56 | 6.5 | 19 |
| ITTB (87 $\mu\text{m}$ ) <sup>15</sup>      | 6880 | 4992  | 1318 | 249 | 374  | 18 | 28 | 5.3 | 13 |
| ITTB (54 $\mu\text{m}$ ) <sup>15</sup>      | 5423 | 3901  | 1012 | 187 | 276  | 20 | 29 | 5.4 | 14 |
| aged 150 days                               | 2034 | 1370  | 354  | 61  | 83   | 25 | 33 | 5.8 | 17 |
| ITTB (35 $\mu\text{m}$ ) <sup>15</sup>      | 3280 | 2063  | 508  | 90  | 115  | 29 | 36 | 5.6 | 18 |

**Table S2.** Diffusion/solubility coefficients and selectivities of CANAL-TB polymers

| Polymer                               | $D$ ( $10^{-8}$ cm <sup>2</sup> /s) |                  |                 |                  | $S$ ( $10^{-2}$ cm <sup>3</sup> /cm <sup>3</sup> cmHg <sup>-1</sup> ) |                   |                   |                   | $O_2/N_2$  |            | $CO_2/CH_4$ |            |
|---------------------------------------|-------------------------------------|------------------|-----------------|------------------|-----------------------------------------------------------------------|-------------------|-------------------|-------------------|------------|------------|-------------|------------|
|                                       | $O_2$                               | $N_2$            | $CH_4$          | $CO_2$           | $O_2$                                                                 | $N_2$             | $CH_4$            | $CO_2$            | $\alpha_D$ | $\alpha_S$ | $\alpha_D$  | $\alpha_S$ |
| <i>anti</i> -CANAL-TB-4 (115 $\mu$ m) | 214<br>$\pm 16$                     | 63.0<br>$\pm 8$  | 24.4<br>$\pm 1$ | 70.6<br>$\pm 11$ | 6.39<br>$\pm 0.8$                                                     | 5.60<br>$\pm 0.7$ | 14.9<br>$\pm 2$   | 44.2<br>$\pm 2$   | 3.39       | 1.14       | 2.90        | 2.95       |
| <i>anti</i> -CANAL-TB-4 (57 $\mu$ m)  | 127<br>$\pm 9$                      | 34.2<br>$\pm 2$  | 12.6<br>$\pm 3$ | 39.1<br>$\pm 3$  | 6.94<br>$\pm 1$                                                       | 5.99<br>$\pm 0.4$ | 16.6<br>$\pm 0.8$ | 57.0<br>$\pm 5$   | 3.72       | 1.16       | 3.10        | 3.43       |
| <i>syn</i> -CANAL-TB-4 (135 $\mu$ m)  | 244<br>$\pm 11$                     | 71.7<br>$\pm 6$  | 30.2<br>$\pm 2$ | 90.0<br>$\pm 5$  | 7.22<br>$\pm 0.6$                                                     | 6.48<br>$\pm 0.9$ | 15.1<br>$\pm 1$   | 39.6<br>$\pm 3$   | 3.41       | 1.11       | 2.96        | 2.63       |
| <i>syn</i> -CANAL-TB-4 (56 $\mu$ m)   | 191<br>$\pm 13$                     | 43.8<br>$\pm 11$ | 15.6<br>$\pm 7$ | 50.3<br>$\pm 8$  | 5.03<br>$\pm 0.4$                                                     | 4.98<br>$\pm 0.5$ | 14.3<br>$\pm 0.6$ | 47.7<br>$\pm 0.9$ | 4.36       | 1.01       | 3.22        | 3.34       |
| <i>anti</i> -CANAL-TB-2 (59 $\mu$ m)  | 204<br>$\pm 24$                     | 57.7<br>$\pm 5$  | 18.5<br>$\pm 2$ | 54.6<br>$\pm 4$  | 4.90<br>$\pm 0.7$                                                     | 4.14<br>$\pm 0.2$ | 13.9<br>$\pm 1$   | 45.2<br>$\pm 2$   | 3.54       | 1.18       | 2.95        | 3.25       |
| <i>syn</i> -CANAL-TB-2 (61 $\mu$ m)   | 182<br>$\pm 18$                     | 48.9<br>$\pm 8$  | 16.6<br>$\pm 5$ | 48.3<br>$\pm 6$  | 4.31<br>$\pm 1$                                                       | 3.97<br>$\pm 0.2$ | 13.5<br>$\pm 0.7$ | 43.7<br>$\pm 0.8$ | 3.72       | 1.09       | 2.91        | 3.24       |
| CANAL-TB-1 <sup>2</sup>               | 94                                  | 22.2             | 7.01            | 34.7             | 4.92                                                                  | 4.37              | 17.3              | 48.3              | 4.22       | 1.13       | 4.95        | 2.80       |
| CANAL-TB-2 <sup>2</sup>               | 175                                 | 44               | 11.4            | 58.0             | 4.27                                                                  | 3.68              | 18.0              | 43.4              | 3.98       | 1.16       | 5.09        | 2.42       |
| Bio-PITB-1 <sup>4</sup>               | 135                                 | 22.7             | 4.58            | 18.4             | 1.85                                                                  | 2.82              | 13.0              | 73.6              | 5.96       | 0.66       | 4.01        | 5.67       |
| Bio-PITB-2 <sup>4</sup>               | 60.4                                | 12.8             | 3.45            | 16.4             | 4.43                                                                  | 4.82              | 17.3              | 84.8              | 4.71       | 0.92       | 4.73        | 4.90       |
| PIM-SBI-TB <sup>10</sup>              | 201                                 | 75.2             | 31.5            | 74               | 3.58                                                                  | 3.09              | 14.3              | 39.2              | 2.67       | 1.16       | 2.35        | 2.74       |
| PIM-EA-TB <sup>10</sup>               | 318                                 | 99.5             | 36              | 87               | 6.76                                                                  | 5.28              | 19.4              | 82.1              | 3.20       | 1.28       | 2.42        | 4.23       |
| PIM-MP-TB <sup>11</sup>               | 106                                 | 18.3             | 6               | 26               | 9.42                                                                  | 10.9              | 44                | 135               | 5.79       | 0.86       | 4.33        | 3.07       |
| PIM-Trip-TB <sup>12</sup>             | 462                                 | 135              | 48.9            | 111              | 5.88                                                                  | 4.66              | 18.5              | 87.5              | 3.42       | 1.26       | 2.27        | 4.73       |
| PIM-BTrip-TB <sup>13</sup>            | 347                                 | 70               | 28              | 99               | 9.48                                                                  | 13.2              | 51.4              | 133               | 4.95       | 0.72       | 3.53        | 2.59       |

**Table S3.** Gas permeability and ideal selectivity of the aged CANAL-TB polymers

| Polymer                         | Permeability (Barrer) |                 |                |                |                 | Selectivity                     |                                |                                |                                  |
|---------------------------------|-----------------------|-----------------|----------------|----------------|-----------------|---------------------------------|--------------------------------|--------------------------------|----------------------------------|
|                                 | H <sub>2</sub>        | CO <sub>2</sub> | O <sub>2</sub> | N <sub>2</sub> | CH <sub>4</sub> | H <sub>2</sub> /CH <sub>4</sub> | H <sub>2</sub> /N <sub>2</sub> | O <sub>2</sub> /N <sub>2</sub> | CO <sub>2</sub> /CH <sub>4</sub> |
| <i>anti</i> -CANAL-TB-2 (59 μm) |                       |                 |                |                |                 |                                 |                                |                                |                                  |
| aged 120 days                   | 2564±<br>69           | 1368±<br>37     | 470±<br>15     | 99±3           | 110±<br>9       | 23.3                            | 25.8                           | 4.75                           | 12.43                            |
| aged 340 days                   | 2048±<br>62           | 1048±<br>29     | 358±<br>9      | 74±1           | 84±2            | 24.4                            | 27.6                           | 4.84                           | 12.50                            |
| <i>syn</i> -CANAL-TB-2 (61 μm)  |                       |                 |                |                |                 |                                 |                                |                                |                                  |
| aged 120 days                   | 2389±<br>74           | 1285±<br>40     | 445±<br>13     | 101±<br>7      | 123±<br>6       | 19.4                            | 23.7                           | 4.41                           | 10.46                            |
| aged 340 days                   | 1902±<br>48           | 1028±<br>21     | 328±<br>17     | 72±2           | 91±1            | 20.9                            | 26.6                           | 4.56                           | 11.29                            |
| <i>anti</i> -CANAL-TB-4 (73 μm) |                       |                 |                |                |                 |                                 |                                |                                |                                  |
| aged 120 days                   | 2849±<br>57           | 1442±<br>33     | 609±<br>20     | 131±<br>6      | 139±<br>4       | 20.5                            | 21.7                           | 4.64                           | 10.38                            |
| aged 340 days                   | 2581±<br>49           | 1249±<br>38     | 505±<br>18     | 107±<br>7      | 118±<br>4       | 21.9                            | 24.2                           | 4.73                           | 10.58                            |
| <i>anti</i> -CANAL-TB-4 (57 μm) |                       |                 |                |                |                 |                                 |                                |                                |                                  |
| aged 120 days                   | 2506±<br>53           | 1271±<br>25     | 463±<br>11     | 97±2           | 116±<br>7       | 21.6                            | 25.7                           | 4.75                           | 10.96                            |
| aged 340 days                   | 2096±<br>63           | 972±3<br>2      | 354±<br>14     | 73±4           | 79±1            | 24.1                            | 28.8                           | 4.87                           | 11.17                            |
| <i>syn</i> -CANAL-TB-4 (83 μm)  |                       |                 |                |                |                 |                                 |                                |                                |                                  |
| aged 120 days                   | 3687±<br>85           | 1728±<br>39     | 692±<br>26     | 143±<br>6      | 160±<br>8       | 23.0                            | 25.8                           | 4.84                           | 10.79                            |
| aged 340 days                   | 3253±<br>79           | 1510±<br>56     | 570±<br>19     | 113±<br>8      | 134±<br>5       | 24.3                            | 28.8                           | 5.04                           | 11.26                            |
| <i>syn</i> -CANAL-TB-4 (56 μm)  |                       |                 |                |                |                 |                                 |                                |                                |                                  |
| aged 120 days                   | 2765±<br>55           | 1324±<br>42     | 486±<br>12     | 95±5           | 95±2            | 29.0                            | 29.1                           | 5.11                           | 13.87                            |
| aged 340 days                   | 2462±<br>68           | 1069±<br>28     | 395±<br>15     | 75±2           | 77±3            | 32.0                            | 32.7                           | 5.24                           | 13.88                            |



## References

- (1) Abdulhamid, M. A.; Lai, H. W. H.; Wang, Y.; Jin, Z.; Teo, Y. C.; Ma, X.; Pinnau, I.; Xia, Y., Microporous Polyimides from Ladder Diamines Synthesized by Facile Catalytic Arene–Norbornene Annulation as High-Performance Membranes for Gas Separation. *Chem. Mater.* **2019**, *31* (5), 1767-1774.
- (2) Ma, X.; Lai, H. W. H.; Wang, Y.; Alhazmi, A.; Xia, Y.; Pinnau, I., Facile Synthesis and Study of Microporous Catalytic Arene-Norbornene Annulation–Tröger's Base Ladder Polymers for Membrane Air Separation. *ACS Macro Lett.* **2020**, *9*, 680-685.
- (3) Zhuang, Y.; Seong, J. G.; Do, Y. S.; Jo, H. J.; Cui, Z.; Lee, J.; Lee, Y. M.; Guiver, M. D., Intrinsically Microporous Soluble Polyimides Incorporating Tröger's Base for Membrane Gas Separation. *Macromolecules* **2014**, *47* (10), 3254-3262.
- (4) Hu, X.; Lee, W. H.; Bae, J. Y.; Zhao, J.; Kim, J. S.; Wang, Z.; Yan, J.; Lee, Y. M., Highly permeable polyimides incorporating Tröger's base (TB) units for gas separation membranes. *J. Membr. Sci.* **2020**, *615*, 118533.
- (5) Zhang, C.; Li, P., Preparation and Gas Separation Properties of Spirobichroman-Based Polyimides. *Macromol. Chem. Phys.* **2018**, *219* (16), 1800157.
- (6) Willems, T. F.; Rycroft, C. H.; Kazi, M.; Meza, J. C.; Haranczyk, M., Algorithms and tools for high-throughput geometry-based analysis of crystalline porous materials. *Microporous Mesoporous Mater.* **2012**, *149* (1), 134-141.
- (7) Zhuang, Y.; Seong, J. G.; Do, Y. S.; Lee, W. H.; Lee, M. J.; Guiver, M. D.; Lee, Y. M., High-strength, soluble polyimide membranes incorporating Tröger's Base for gas separation. *J. Membr. Sci.* **2016**, *504*, 55-65.
- (8) Zhuang, Y.; Seong, J. G.; Do, Y. S.; Lee, W. H.; Lee, M. J.; Cui, Z.; Lozano, A. E.; Guiver, M. D.; Lee, Y. M., Soluble, microporous, Tröger's Base copolyimides with tunable membrane performance for gas separation. *Chem. Commun.* **2016**, *52* (19), 3817-3820.
- (9) Zhang, Y.; Lee, W. H.; Seong, J. G.; Bae, J. Y.; Zhuang, Y.; Feng, S.; Wan, Y.; Lee, Y. M., Alicyclic segments upgrade hydrogen separation performance of intrinsically microporous polyimide membranes. *J. Membr. Sci.* **2020**, *611*, 118363.
- (10) Carta, M.; Malpass-Evans, R.; Croad, M.; Rogan, Y.; Jansen, J. C.; Bernardo, P.; Bazzarelli, F.; McKeown, N. B., An efficient polymer molecular sieve for membrane gas separations. *Science* **2013**, *339* (6117), 303-307.
- (11) Williams, R.; Burt, L. A.; Esposito, E.; Jansen, J. C.; Tocci, E.; Rizzuto, C.; Lanč, M.; Carta, M.; McKeown, N. B., A highly rigid and gas selective methanopentacene-based polymer of intrinsic microporosity derived from Tröger's base polymerization. *J. Mater. Chem. A* **2018**, *6* (14), 5661-5667.
- (12) Carta, M.; Croad, M.; Malpass-Evans, R.; Jansen, J. C.; Bernardo, P.; Clarizia, G.; Friess, K.; Lanč, M.; McKeown, N. B., Triptycene Induced Enhancement of Membrane Gas Selectivity for Microporous Tröger's Base Polymers. *Adv. Mater.* **2014**, *26* (21), 3526-3531.
- (13) Rose, I.; Carta, M.; Malpass-Evans, R.; Ferrari, M.-C.; Bernardo, P.; Clarizia, G.; Jansen, J. C.; McKeown, N. B., Highly Permeable Benzotriptycene-Based Polymer of Intrinsic Microporosity. *ACS Macro Lett.* **2015**, *4* (9), 912-915.
- (14) Rose, I.; Bezzu, C. G.; Carta, M.; Comesaña-Gándara, B.; Lasseuguette, E.; Ferrari, M. C.; Bernardo, P.; Clarizia, G.; Fuoco, A.; Jansen, J. C.; Hart, Kyle E.; Liyana-Arachchi, T. P.; Colina, C. M.; McKeown, N. B., Polymer ultrapermeability from the inefficient packing of 2D chains. *Nat. Mater.* **2017**, *16* (9), 932-937.
- (15) Zhu, Z.; Zhu, J.; Li, J.; Ma, X., Enhanced Gas Separation Properties of Tröger's Base Polymer Membranes Derived from Pure Triptycene Diamine Regioisomers. *Macromolecules* **2020**, *53* (5), 1573-1584.
